# Supplementary material for: Unveiling anharmonic coupling by means of excited state ab initio dynamics: application to diarylethene photoreactivity
Source: Royal Society of Chemistry journal article supplement (doi:10.1039/c8cp04707c), 2018-10-01
Supplement: c8cp04707c1.pdf [file c8cp04707c1.pdf]

**Electronic Supporting Information**

**Unveiling anharmonic coupling by means of  
excited state ab-initio dynamics: application to  
diarylethenes photoreactivity**

Maria Gabriella Chiariello,<sup>a</sup> Umberto Raucci,<sup>a</sup> Federico Coppola<sup>a</sup> and Nadia Rega,<sup>\*a</sup>

a) Dipartimento di Scienze Chimiche, Università di Napoli 'Federico II', Complesso Universitario di M.S. Angelo, via Cintia, Napoli 80126, Italy

Correspondence to: Nadia Rega, [nadia.rega@unina.it](mailto:nadia.rega@unina.it)

# Contents

Table 1: CHD molecule main structural parameters averaged from ground and excited state AIMD's.

Figure 1: Sketch of CHD normal modes corresponding to harmonic frequency values calculated in  $S_1$ : a) wagging mode b)-d) stretching modes.

Figure 2: 2D wavelet map of the methyl wagging motion in the excited state from TRJ I.

Figure 3: 2D wavelet map of the methyl wagging motion in the excited state from TRJ II and TRJ III.

Figure 4: 2D wavelet map of the CC stretching localized on cyclohexadiene from TRJ I.

Figure 5: 2D wavelet map of the CC stretching localized on cyclohexadiene from TRJ II and TRJ III.

Figure 6: 2D wavelet map of the CC stretching localized on thiophene ring from TRJ I.

Figure 7: 2D wavelet map of the CC stretching localized on thiophene ring from TRJ II and TRJ III.

Figure 8: 2D wavelet map of the CCC bending localized on cyclohexadiene and thiophene rings from TRJ I.

Figure 9: 2D wavelet map of the CCC bending localized on cyclohexadiene and thiophene rings from TRJ II and TRJ III.

Table 1: Main structural parameters computed for the CHD molecule from the ground state and excited states AIMD. Values are reported in Å as mean  $\pm$  st. dev.

|      | TRJ $S_0$       | TRJ I $S_1$     | TRJ II $S_1$    | TRJ III $S_1$   |
|------|-----------------|-----------------|-----------------|-----------------|
| CC1  | 1.55 $\pm$ 0.03 | 1.60 $\pm$ 0.04 | 1.60 $\pm$ 0.04 | 1.60 $\pm$ 0.04 |
| CC2  | 1.47 $\pm$ 0.03 | 1.42 $\pm$ 0.02 | 1.42 $\pm$ 0.02 | 1.42 $\pm$ 0.03 |
| CC3  | 1.54 $\pm$ 0.03 | 1.52 $\pm$ 0.04 | 1.52 $\pm$ 0.02 | 1.52 $\pm$ 0.03 |
| CC4  | 1.54 $\pm$ 0.03 | 1.52 $\pm$ 0.03 | 1.52 $\pm$ 0.02 | 1.52 $\pm$ 0.04 |
| CC5  | 1.37 $\pm$ 0.02 | 1.42 $\pm$ 0.03 | 1.42 $\pm$ 0.02 | 1.42 $\pm$ 0.03 |
| CC6  | 1.37 $\pm$ 0.02 | 1.42 $\pm$ 0.03 | 1.42 $\pm$ 0.02 | 1.42 $\pm$ 0.03 |
| CC7  | 1.45 $\pm$ 0.03 | 1.42 $\pm$ 0.03 | 1.42 $\pm$ 0.02 | 1.42 $\pm$ 0.03 |
| CC8  | 1.45 $\pm$ 0.03 | 1.42 $\pm$ 0.03 | 1.42 $\pm$ 0.02 | 1.42 $\pm$ 0.03 |
| CC9  | 1.37 $\pm$ 0.03 | 1.40 $\pm$ 0.03 | 1.40 $\pm$ 0.02 | 1.40 $\pm$ 0.03 |
| CC10 | 1.37 $\pm$ 0.03 | 1.40 $\pm$ 0.03 | 1.40 $\pm$ 0.02 | 1.40 $\pm$ 0.03 |
| CS11 | 1.77 $\pm$ 0.03 | 1.76 $\pm$ 0.03 | 1.76 $\pm$ 0.02 | 1.76 $\pm$ 0.03 |
| CS12 | 1.77 $\pm$ 0.04 | 1.76 $\pm$ 0.03 | 1.76 $\pm$ 0.03 | 1.76 $\pm$ 0.04 |
| CS13 | 1.87 $\pm$ 0.04 | 1.84 $\pm$ 0.04 | 1.84 $\pm$ 0.03 | 1.84 $\pm$ 0.04 |
| CS14 | 1.87 $\pm$ 0.05 | 1.84 $\pm$ 0.04 | 1.84 $\pm$ 0.03 | 1.84 $\pm$ 0.04 |
| CC15 | 1.51 $\pm$ 0.03 | 1.50 $\pm$ 0.03 | 1.50 $\pm$ 0.02 | 1.50 $\pm$ 0.03 |
| CC16 | 1.51 $\pm$ 0.03 | 1.50 $\pm$ 0.03 | 1.50 $\pm$ 0.02 | 1.50 $\pm$ 0.04 |
| CC17 | 1.56 $\pm$ 0.03 | 1.56 $\pm$ 0.03 | 1.56 $\pm$ 0.02 | 1.56 $\pm$ 0.03 |
| CC18 | 1.56 $\pm$ 0.03 | 1.56 $\pm$ 0.03 | 1.56 $\pm$ 0.02 | 1.56 $\pm$ 0.03 |

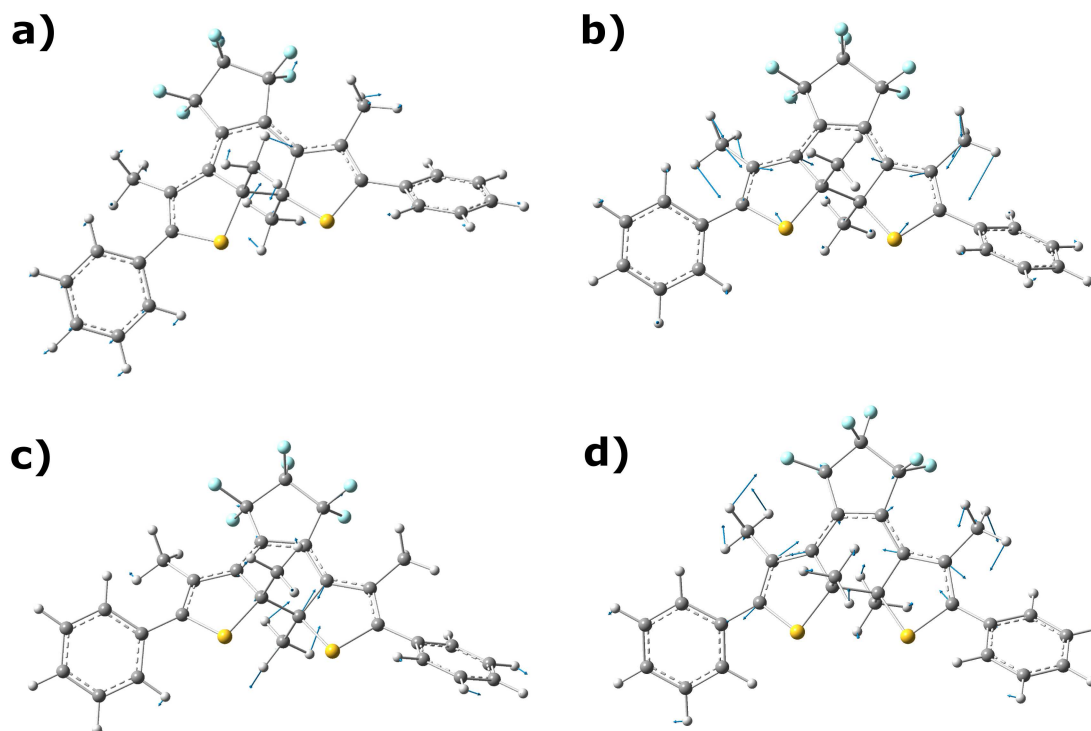

Figure 1: Sketch of CHD normal modes corresponding to harmonic frequency values calculated in  $S_1$ : a) wagging mode b)-d) stretching modes

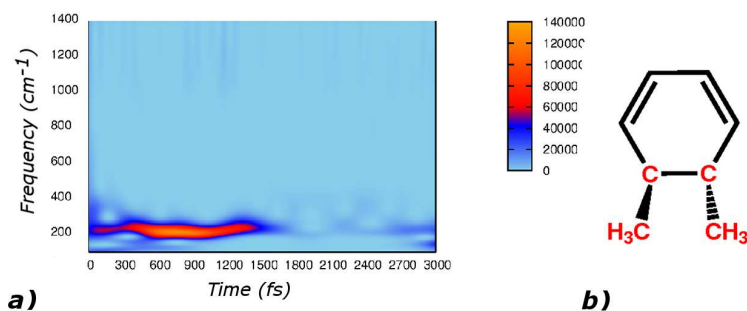

Figure 2: a) 2D wavelet map of the methyl wagging motion in excited state. b) Cyclohexadiene unit of CHD, with the atoms participating to the methyl wag (AIMD Frequency  $200\text{ cm}^{-1}$ ) highlighted in red.

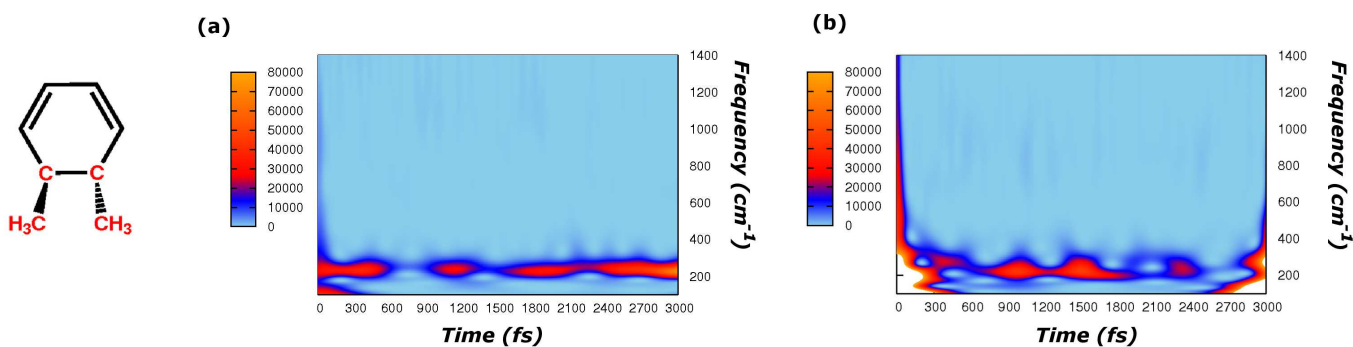

Figure 3: a) 2D wavelet map of the methyl wagging motion in the excited state from TRJ II. b) 2D wavelet map of the methyl wagging motion in the excited state from TRJ III.

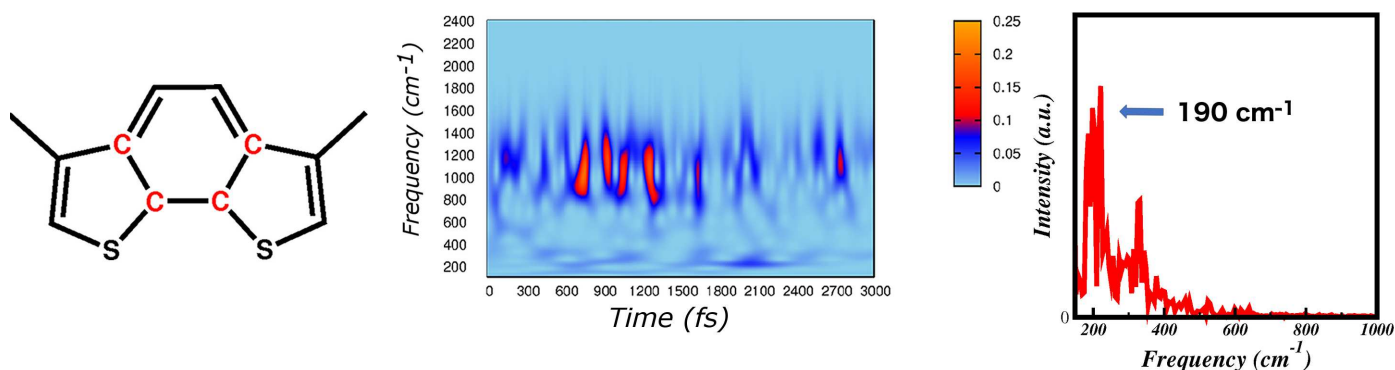

Figure 4: Left panel: 2D wavelet map of the  $CC$  stretching localized on cyclohexadiene unit. Central panel: Atoms in red participate to the  $CC$  stretching (AIMD Frequency  $1186\text{ cm}^{-1}$ ). Right panel) Discrete Fourier Transform of the intensity oscillations.

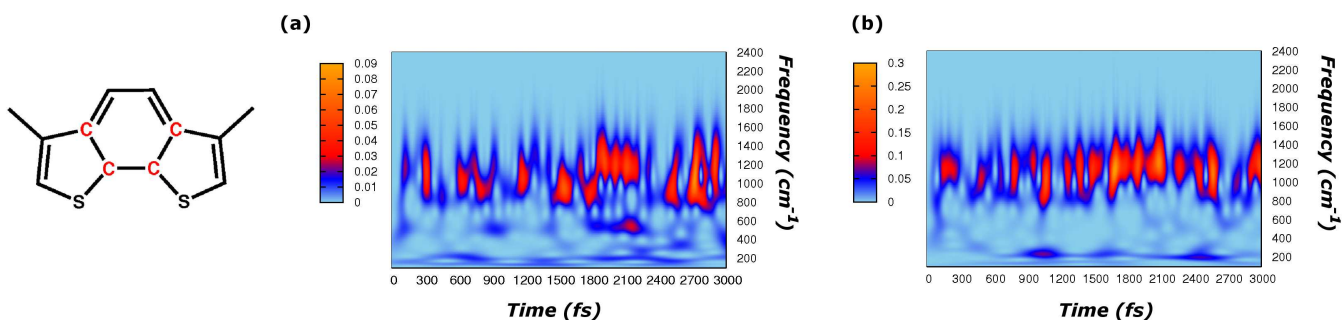

Figure 5: a) 2D wavelet map of the CC stretching localized on cyclohexadiene from TRJ II. b) 2D wavelet map of the CC stretching localized on cyclohexadiene from TRJ III.

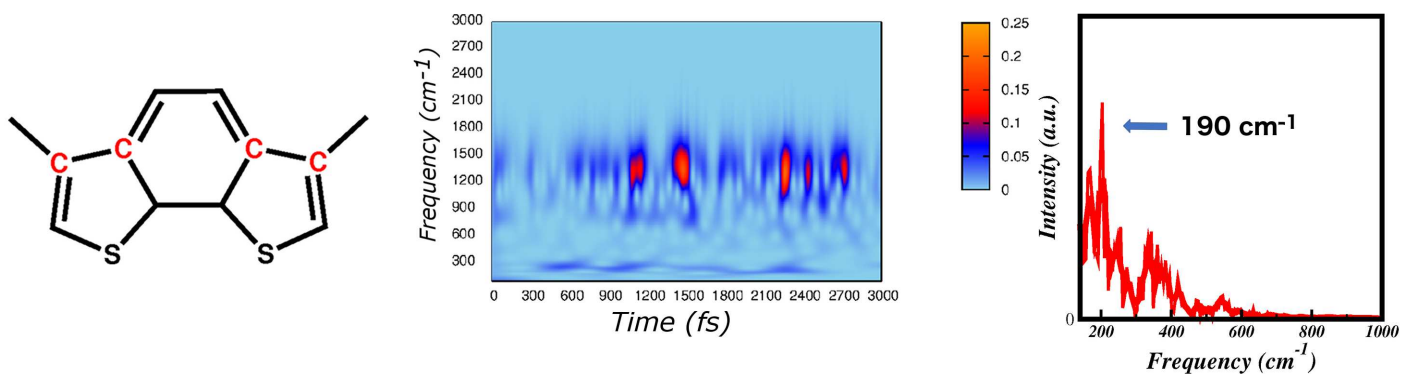

Figure 6: Left panel: 2D wavelet map of the  $CC$  stretching localized on thiophene rings. Central panel: Atoms in red participate to the  $CC$  stretching (AIMD Frequency  $1380\text{ cm}^{-1}$ ). Right panel: Discrete Fourier Transform of the intensity oscillations.

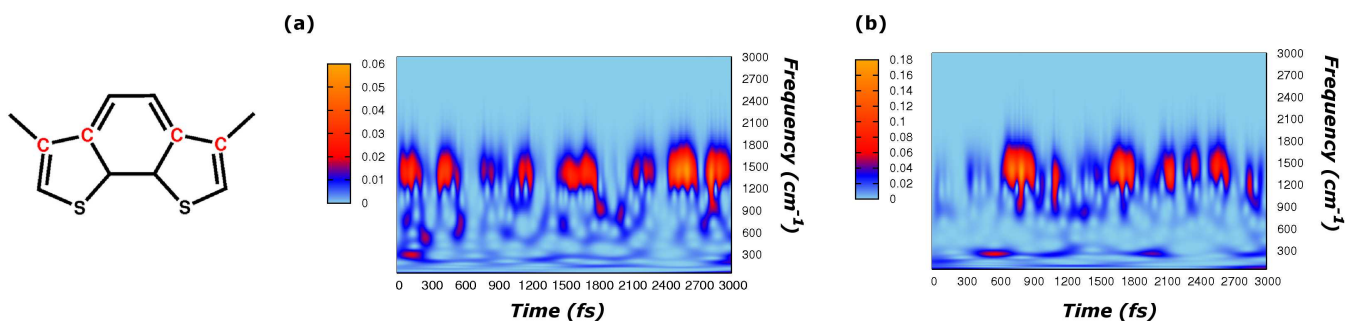

Figure 7: a) 2D wavelet map of the CC stretching localized on thiophene ring from TRJ II. b) 2D wavelet map of the CC stretching localized on thiophene from TRJ III.

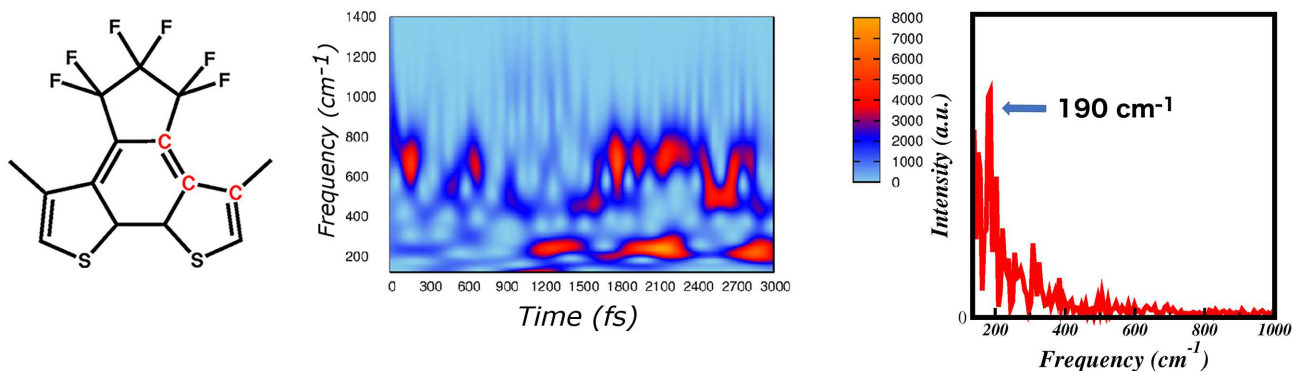

Figure 8: Left panel: 2D wavelet map of the *CCC* bending localized on cyclohexadiene and thiophene rings. Central panel: Atoms in red participate to the *CCC* bending (AIMD Frequency 469  $\text{cm}^{-1}$ ). Right panel: Discrete Fourier Transform of the intensity oscillations.

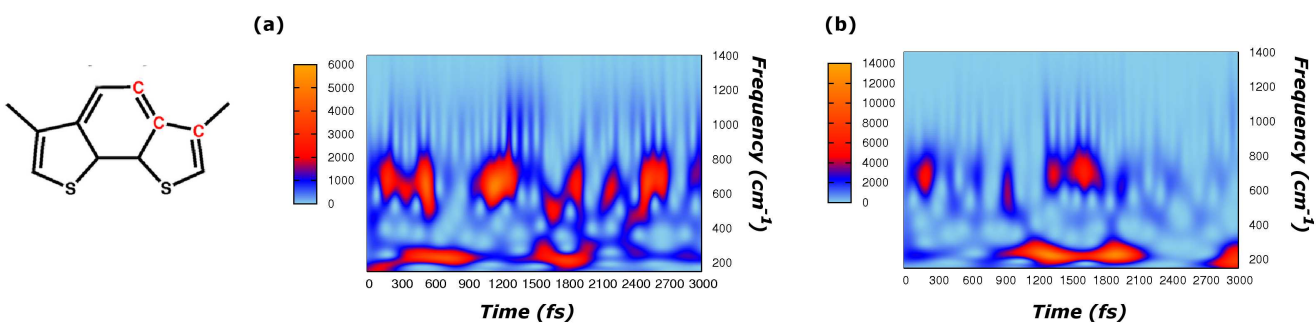

Figure 9: a) 2D wavelet map of the *CCC* bending localized on cyclohexadiene and thiophene rings from TRJ II. b) 2D wavelet map of the *CCC* bending localized on cyclohexadiene and thiophene rings from TRJ III.
